# Supplementary material
Source: publisher figshare collection journal article supplement (https://acs.figshare.com/ndownloader/files/5740881)
Supplement: Supplementary file 1 [file 5740881]

  
data_dr2079 
  
_audit_creation_method            SHELXL-97 
_chemical_name_systematic 
; 
 ? 
; 
_chemical_name_common             ? 
_chemical_melting_point           ? 
_chemical_formula_moiety          ? 
_chemical_formula_sum 
 'C24 H40 F5 N7 Ti' 
_chemical_formula_weight          569.53 
  
loop_ 
 _atom_type_symbol 
 _atom_type_description 
 _atom_type_scat_dispersion_real 
 _atom_type_scat_dispersion_imag 
 _atom_type_scat_source 
 'C'  'C'   0.0033   0.0016 
 'International Tables Vol C Tables 4.2.6.8 and 6.1.1.4' 
 'H'  'H'   0.0000   0.0000 
 'International Tables Vol C Tables 4.2.6.8 and 6.1.1.4' 
 'N'  'N'   0.0061   0.0033 
 'International Tables Vol C Tables 4.2.6.8 and 6.1.1.4' 
 'F'  'F'   0.0171   0.0103 
 'International Tables Vol C Tables 4.2.6.8 and 6.1.1.4' 
 'Ti'  'Ti'   0.2776   0.4457 
 'International Tables Vol C Tables 4.2.6.8 and 6.1.1.4' 
  
_symmetry_cell_setting            Monoclinic 
_symmetry_space_group_name_H-M    C2/c 
  
loop_ 
 _symmetry_equiv_pos_as_xyz 
 'x, y, z' 
 '-x, y, -z+1/2' 
 'x+1/2, y+1/2, z' 
 '-x+1/2, y+1/2, -z+1/2' 
 '-x, -y, -z' 
 'x, -y, z-1/2' 
 '-x+1/2, -y+1/2, -z' 
 'x+1/2, -y+1/2, z-1/2' 
  
_cell_length_a                    13.776(2) 
_cell_length_b                    15.674(3) 
_cell_length_c                    14.189(2) 
_cell_angle_alpha                 90.00 
_cell_angle_beta                  105.957(2) 
_cell_angle_gamma                 90.00 
_cell_volume                      2945.6(8) 
_cell_formula_units_Z             4 
_cell_measurement_temperature     203(2) 
_cell_measurement_reflns_used     54 
_cell_measurement_theta_min       1.47 
_cell_measurement_theta_max       28.29 
  
_exptl_crystal_description        needle 
_exptl_crystal_colour             red 
_exptl_crystal_size_max           0.40 
_exptl_crystal_size_mid           0.10 
_exptl_crystal_size_min           0.10 
_exptl_crystal_density_meas       ? 
_exptl_crystal_density_diffrn     1.284 
_exptl_crystal_density_method     'not measured' 
_exptl_crystal_F_000              1200 
_exptl_absorpt_coefficient_mu     0.347 
_exptl_absorpt_correction_type    multi-scan 
_exptl_absorpt_correction_T_min   0.881444 
_exptl_absorpt_correction_T_max   1.000000 
_exptl_absorpt_process_details    'SADABS, Bruker (2000)' 
  
_exptl_special_details 
; 
Data collection is performed with three batch runs at phi = 0.00 deg 
(606 frames), at phi = 90.00 deg (435 frames), and at phi = 180 deg (230 frames) 
A fourth batch run is collected at phi = 0.00 deg (50 frames) to monitor crystal 
and diffractometer stability. Frame width = 0.30 deg in omega. Data is merged, 
corrected for decay (if any), and treated with multi-scan absorption corrections 
(if required). All symmetry-equivalent reflections are merged for 
centrosymmetric data. Friedel pairs are not merged for noncentrosymmetric data. 
; 
  
_diffrn_ambient_temperature       203(2) 
_diffrn_radiation_wavelength      0.71073 
_diffrn_radiation_type            MoK\a 
_diffrn_radiation_source          'fine-focus sealed tube' 
_diffrn_radiation_monochromator   graphite 
_diffrn_measurement_device_type   'CCD area detector' 
_diffrn_measurement_method        'phi and omega scans' 
_diffrn_detector_area_resol_mean  ? 
_diffrn_standards_number          ? 
_diffrn_standards_interval_count  ? 
_diffrn_standards_interval_time   ? 
_diffrn_standards_decay_%         <1 
_diffrn_reflns_number             12745 
_diffrn_reflns_av_R_equivalents   0.0286 
_diffrn_reflns_av_sigmaI/netI     0.0287 
_diffrn_reflns_limit_h_min        -17 
_diffrn_reflns_limit_h_max        17 
_diffrn_reflns_limit_k_min        -20 
_diffrn_reflns_limit_k_max        20 
_diffrn_reflns_limit_l_min        -18 
_diffrn_reflns_limit_l_max        18 
_diffrn_reflns_theta_min          2.01 
_diffrn_reflns_theta_max          28.86 
_reflns_number_total              3474 
_reflns_number_gt                 2875 
_reflns_threshold_expression      >2sigma(I) 
  
_computing_data_collection        'SMART, Bruker (2000)' 
_computing_cell_refinement        'SMART, Bruker (2000)' 
_computing_data_reduction         'XPREP, Bruker (2000)' 
_computing_structure_solution     'SHELXS-97 (Sheldrick, 1990)' 
_computing_structure_refinement   'SHELXL-97 (Sheldrick, 1997)' 
_computing_molecular_graphics     'SHELXTL, Bruker (2000)' 
_computing_publication_material   'SHELXTL, Bruker (2000)' 
  
_refine_special_details 
; 
 Refinement of F^2^ against ALL reflections.  The weighted R-factor wR and 
 goodness of fit S are based on F^2^, conventional R-factors R are based 
 on F, with F set to zero for negative F^2^. The threshold expression of 
 F^2^ > 2sigma(F^2^) is used only for calculating R-factors(gt) etc. and is 
 not relevant to the choice of reflections for refinement.  R-factors based 
 on F^2^ are statistically about twice as large as those based on F, and R- 
 factors based on ALL data will be even larger. 
; 
  
_refine_ls_structure_factor_coef  Fsqd 
_refine_ls_matrix_type            full 
_refine_ls_weighting_scheme       calc 
_refine_ls_weighting_details 
 'calc w=1/[\s^2^(Fo^2^)+(0.0448P)^2^+2.3608P] where P=(Fo^2^+2Fc^2^)/3' 
_atom_sites_solution_primary      direct 
_atom_sites_solution_secondary    difmap 
_atom_sites_solution_hydrogens    geom 
_refine_ls_hydrogen_treatment     mixed 
_refine_ls_extinction_method      none 
_refine_ls_extinction_coef        ? 
_refine_ls_number_reflns          3474 
_refine_ls_number_parameters      170 
_refine_ls_number_restraints      0 
_refine_ls_R_factor_all           0.0586 
_refine_ls_R_factor_gt            0.0426 
_refine_ls_wR_factor_ref          0.1079 
_refine_ls_wR_factor_gt           0.0995 
_refine_ls_goodness_of_fit_ref    1.075 
_refine_ls_restrained_S_all       1.075 
_refine_ls_shift/su_max           0.000 
_refine_ls_shift/su_mean          0.000 
  
loop_ 
 _atom_site_label 
 _atom_site_type_symbol 
 _atom_site_fract_x 
 _atom_site_fract_y 
 _atom_site_fract_z 
 _atom_site_U_iso_or_equiv 
 _atom_site_adp_type 
 _atom_site_occupancy 
 _atom_site_symmetry_multiplicity 
 _atom_site_calc_flag 
 _atom_site_refinement_flags 
 _atom_site_disorder_assembly 
 _atom_site_disorder_group 
Ti Ti 1.0000 0.25712(3) 0.2500 0.02859(13) Uani 1 2 d S . . 
F1 F 0.83140(9) 0.05009(9) 0.14808(10) 0.0594(4) Uani 1 1 d . . . 
F2 F 0.83049(12) -0.12107(10) 0.15284(12) 0.0736(5) Uani 1 1 d . . . 
F3 F 1.0000 -0.20959(12) 0.2500 0.0843(8) Uani 1 2 d S . . 
N1 N 1.06629(11) 0.28462(10) 0.13749(11) 0.0326(3) Uani 1 1 d . . . 
N2 N 0.91053(11) 0.32887(9) 0.13232(11) 0.0324(3) Uani 1 1 d . . . 
N3 N 0.97576(12) 0.36476(10) -0.00399(12) 0.0385(4) Uani 1 1 d . . . 
N4 N 1.0000 0.14532(14) 0.2500 0.0396(5) Uani 1 2 d S . . 
C1 C 1.12623(15) 0.22993(13) 0.08903(15) 0.0412(4) Uani 1 1 d . . . 
H1A H 1.1537 0.2660 0.0451 0.049 Uiso 1 1 calc R . . 
C2 C 1.0606(2) 0.16019(17) 0.02784(18) 0.0634(7) Uani 1 1 d . . . 
H2A H 1.0055 0.1862 -0.0216 0.095 Uiso 1 1 calc R . . 
H2B H 1.0335 0.1242 0.0701 0.095 Uiso 1 1 calc R . . 
H2C H 1.1012 0.1260 -0.0039 0.095 Uiso 1 1 calc R . . 
C3 C 1.21386(16) 0.19197(14) 0.16747(17) 0.0489(5) Uani 1 1 d . . . 
H3A H 1.2543 0.2376 0.2049 0.073 Uiso 1 1 calc R . . 
H3B H 1.2553 0.1578 0.1367 0.073 Uiso 1 1 calc R . . 
H3C H 1.1879 0.1563 0.2109 0.073 Uiso 1 1 calc R . . 
C4 C 0.83156(14) 0.39567(12) 0.11580(15) 0.0376(4) Uani 1 1 d . . . 
H4A H 0.8371 0.4316 0.0601 0.045 Uiso 1 1 calc R . . 
C5 C 0.72612(16) 0.35577(15) 0.0896(2) 0.0533(6) Uani 1 1 d . . . 
H5A H 0.7171 0.3200 0.0320 0.080 Uiso 1 1 calc R . . 
H5B H 0.6756 0.4006 0.0761 0.080 Uiso 1 1 calc R . . 
H5C H 0.7188 0.3214 0.1441 0.080 Uiso 1 1 calc R . . 
C6 C 0.84646(18) 0.45265(13) 0.20611(17) 0.0499(5) Uani 1 1 d . . . 
H6A H 0.9133 0.4779 0.2220 0.075 Uiso 1 1 calc R . . 
H6B H 0.8395 0.4187 0.2611 0.075 Uiso 1 1 calc R . . 
H6C H 0.7960 0.4975 0.1926 0.075 Uiso 1 1 calc R . . 
C7 C 1.06431(16) 0.39669(15) -0.03001(17) 0.0506(5) Uani 1 1 d . . . 
H7A H 1.1226 0.3941 0.0269 0.076 Uiso 1 1 calc R . . 
H7B H 1.0528 0.4553 -0.0521 0.076 Uiso 1 1 calc R . . 
H7C H 1.0765 0.3619 -0.0821 0.076 Uiso 1 1 calc R . . 
C8 C 0.88288(17) 0.36571(15) -0.08409(15) 0.0490(5) Uani 1 1 d . . . 
H8A H 0.8276 0.3441 -0.0608 0.073 Uiso 1 1 calc R . . 
H8B H 0.8912 0.3300 -0.1371 0.073 Uiso 1 1 calc R . . 
H8C H 0.8681 0.4237 -0.1075 0.073 Uiso 1 1 calc R . . 
C9 C 0.98344(13) 0.32701(11) 0.08554(13) 0.0317(4) Uani 1 1 d . . . 
C10 C 1.0000 0.05848(16) 0.2500 0.0328(5) Uani 1 2 d S . . 
C11 C 0.91579(14) 0.00969(13) 0.19990(14) 0.0389(4) Uani 1 1 d . . . 
C12 C 0.91491(17) -0.07869(13) 0.20112(16) 0.0462(5) Uani 1 1 d . . . 
C13 C 1.0000 -0.12313(17) 0.2500 0.0512(8) Uani 1 2 d S . . 
  
loop_ 
 _atom_site_aniso_label 
 _atom_site_aniso_U_11 
 _atom_site_aniso_U_22 
 _atom_site_aniso_U_33 
 _atom_site_aniso_U_23 
 _atom_site_aniso_U_13 
 _atom_site_aniso_U_12 
Ti 0.0323(2) 0.0269(2) 0.0292(2) 0.000 0.01279(17) 0.000 
F1 0.0418(7) 0.0694(9) 0.0614(8) 0.0034(7) 0.0047(6) 0.0076(6) 
F2 0.0750(10) 0.0706(9) 0.0805(10) -0.0265(8) 0.0302(8) -0.0389(8) 
F3 0.134(2) 0.0271(9) 0.1087(19) 0.000 0.0620(17) 0.000 
N1 0.0318(8) 0.0368(8) 0.0321(7) 0.0027(6) 0.0135(6) 0.0030(6) 
N2 0.0309(8) 0.0325(7) 0.0368(8) 0.0041(6) 0.0143(6) 0.0013(6) 
N3 0.0352(8) 0.0456(9) 0.0362(8) 0.0098(7) 0.0123(7) -0.0026(7) 
N4 0.0488(14) 0.0299(11) 0.0469(13) 0.000 0.0246(11) 0.000 
C1 0.0419(11) 0.0471(11) 0.0420(10) 0.0037(8) 0.0240(9) 0.0081(8) 
C2 0.0687(16) 0.0720(16) 0.0524(13) -0.0229(12) 0.0215(12) 0.0067(13) 
C3 0.0424(12) 0.0483(11) 0.0624(14) 0.0080(10) 0.0252(10) 0.0129(9) 
C4 0.0334(10) 0.0348(9) 0.0470(11) 0.0080(8) 0.0152(8) 0.0032(7) 
C5 0.0340(11) 0.0529(13) 0.0745(15) 0.0082(11) 0.0173(10) 0.0010(9) 
C6 0.0543(13) 0.0403(10) 0.0593(13) 0.0009(9) 0.0225(11) 0.0128(9) 
C7 0.0475(12) 0.0562(13) 0.0545(13) 0.0164(10) 0.0249(10) -0.0023(10) 
C8 0.0470(12) 0.0585(13) 0.0386(11) 0.0083(9) 0.0070(9) -0.0020(10) 
C9 0.0324(9) 0.0313(8) 0.0328(9) 0.0004(7) 0.0112(7) -0.0039(7) 
C10 0.0383(14) 0.0290(11) 0.0354(13) 0.000 0.0175(11) 0.000 
C11 0.0379(10) 0.0416(10) 0.0391(10) 0.0003(8) 0.0138(8) 0.0005(8) 
C12 0.0536(13) 0.0427(11) 0.0483(11) -0.0115(9) 0.0241(10) -0.0159(9) 
C13 0.080(2) 0.0255(12) 0.0597(19) 0.000 0.0385(18) 0.000 
  
_geom_special_details 
; 
 All esds (except the esd in the dihedral angle between two l.s. planes) 
 are estimated using the full covariance matrix.  The cell esds are taken 
 into account individually in the estimation of esds in distances, angles 
 and torsion angles; correlations between esds in cell parameters are only 
 used when they are defined by crystal symmetry.  An approximate (isotropic) 
 treatment of cell esds is used for estimating esds involving l.s. planes. 
; 
  
loop_ 
 _geom_bond_atom_site_label_1 
 _geom_bond_atom_site_label_2 
 _geom_bond_distance 
 _geom_bond_site_symmetry_2 
 _geom_bond_publ_flag 
Ti N4 1.752(2) . ? 
Ti N1 2.0904(14) . ? 
Ti N1 2.0904(14) 2_755 ? 
Ti N2 2.1072(15) 2_755 ? 
Ti N2 2.1072(15) . ? 
Ti C9 2.5307(18) 2_755 ? 
Ti C9 2.5307(18) . ? 
F1 C11 1.350(2) . ? 
F2 C12 1.351(2) . ? 
F3 C13 1.355(3) . ? 
N1 C9 1.351(2) . ? 
N1 C1 1.484(2) . ? 
N2 C9 1.348(2) . ? 
N2 C4 1.481(2) . ? 
N3 C9 1.379(2) . ? 
N3 C7 1.457(2) . ? 
N3 C8 1.459(3) . ? 
N4 C10 1.361(3) . ? 
C1 C3 1.520(3) . ? 
C1 C2 1.528(3) . ? 
C4 C5 1.530(3) . ? 
C4 C6 1.529(3) . ? 
C10 C11 1.408(2) . ? 
C10 C11 1.408(2) 2_755 ? 
C11 C12 1.385(3) . ? 
C12 C13 1.376(3) . ? 
C13 C12 1.376(3) 2_755 ? 
  
loop_ 
 _geom_angle_atom_site_label_1 
 _geom_angle_atom_site_label_2 
 _geom_angle_atom_site_label_3 
 _geom_angle 
 _geom_angle_site_symmetry_1 
 _geom_angle_site_symmetry_3 
 _geom_angle_publ_flag 
N4 Ti N1 101.90(4) . . ? 
N4 Ti N1 101.90(4) . 2_755 ? 
N1 Ti N1 156.20(9) . 2_755 ? 
N4 Ti N2 122.26(4) . 2_755 ? 
N1 Ti N2 102.24(6) . 2_755 ? 
N1 Ti N2 64.40(6) 2_755 2_755 ? 
N4 Ti N2 122.26(4) . . ? 
N1 Ti N2 64.40(6) . . ? 
N1 Ti N2 102.24(6) 2_755 . ? 
N2 Ti N2 115.48(8) 2_755 . ? 
N4 Ti C9 115.65(4) . 2_755 ? 
N1 Ti C9 131.86(6) . 2_755 ? 
N1 Ti C9 32.24(6) 2_755 2_755 ? 
N2 Ti C9 32.17(6) 2_755 2_755 ? 
N2 Ti C9 112.61(6) . 2_755 ? 
N4 Ti C9 115.65(4) . . ? 
N1 Ti C9 32.24(6) . . ? 
N1 Ti C9 131.86(6) 2_755 . ? 
N2 Ti C9 112.61(6) 2_755 . ? 
N2 Ti C9 32.17(6) . . ? 
C9 Ti C9 128.70(8) 2_755 . ? 
C9 N1 C1 121.72(15) . . ? 
C9 N1 Ti 92.13(10) . . ? 
C1 N1 Ti 130.57(12) . . ? 
C9 N2 C4 123.48(15) . . ? 
C9 N2 Ti 91.49(11) . . ? 
C4 N2 Ti 138.31(12) . . ? 
C9 N3 C7 121.56(16) . . ? 
C9 N3 C8 123.42(16) . . ? 
C7 N3 C8 114.52(16) . . ? 
C10 N4 Ti 180.0 . . ? 
N1 C1 C3 108.54(16) . . ? 
N1 C1 C2 111.05(17) . . ? 
C3 C1 C2 111.26(19) . . ? 
N2 C4 C5 110.87(16) . . ? 
N2 C4 C6 110.89(16) . . ? 
C5 C4 C6 110.00(18) . . ? 
N2 C9 N1 111.97(15) . . ? 
N2 C9 N3 124.44(16) . . ? 
N1 C9 N3 123.58(16) . . ? 
N2 C9 Ti 56.34(9) . . ? 
N1 C9 Ti 55.63(9) . . ? 
N3 C9 Ti 179.21(14) . . ? 
N4 C10 C11 122.90(12) . . ? 
N4 C10 C11 122.90(12) . 2_755 ? 
C11 C10 C11 114.2(2) . 2_755 ? 
F1 C11 C12 117.81(18) . . ? 
F1 C11 C10 119.13(18) . . ? 
C12 C11 C10 123.06(19) . . ? 
F2 C12 C13 120.1(2) . . ? 
F2 C12 C11 119.6(2) . . ? 
C13 C12 C11 120.2(2) . . ? 
F3 C13 C12 120.42(13) . 2_755 ? 
F3 C13 C12 120.42(13) . . ? 
C12 C13 C12 119.2(3) 2_755 . ? 
  
loop_ 
 _geom_torsion_atom_site_label_1 
 _geom_torsion_atom_site_label_2 
 _geom_torsion_atom_site_label_3 
 _geom_torsion_atom_site_label_4 
 _geom_torsion 
 _geom_torsion_site_symmetry_1 
 _geom_torsion_site_symmetry_2 
 _geom_torsion_site_symmetry_3 
 _geom_torsion_site_symmetry_4 
 _geom_torsion_publ_flag 
N4 Ti N1 C9 119.68(10) . . . . ? 
N1 Ti N1 C9 -60.32(10) 2_755 . . . ? 
N2 Ti N1 C9 -113.17(11) 2_755 . . . ? 
N2 Ti N1 C9 -0.57(10) . . . . ? 
C9 Ti N1 C9 -98.80(14) 2_755 . . . ? 
N4 Ti N1 C1 -16.73(16) . . . . ? 
N1 Ti N1 C1 163.27(16) 2_755 . . . ? 
N2 Ti N1 C1 110.41(16) 2_755 . . . ? 
N2 Ti N1 C1 -136.99(18) . . . . ? 
C9 Ti N1 C1 124.78(16) 2_755 . . . ? 
C9 Ti N1 C1 -136.4(2) . . . . ? 
N4 Ti N2 C9 -87.59(10) . . . . ? 
N1 Ti N2 C9 0.58(10) . . . . ? 
N1 Ti N2 C9 159.68(10) 2_755 . . . ? 
N2 Ti N2 C9 92.41(10) 2_755 . . . ? 
C9 Ti N2 C9 127.59(11) 2_755 . . . ? 
N4 Ti N2 C4 123.23(16) . . . . ? 
N1 Ti N2 C4 -148.60(19) . . . . ? 
N1 Ti N2 C4 10.50(18) 2_755 . . . ? 
N2 Ti N2 C4 -56.77(16) 2_755 . . . ? 
C9 Ti N2 C4 -21.59(19) 2_755 . . . ? 
C9 Ti N2 C4 -149.2(2) . . . . ? 
N1 Ti N4 C10 -131(100) . . . . ? 
N1 Ti N4 C10 49(100) 2_755 . . . ? 
N2 Ti N4 C10 116(100) 2_755 . . . ? 
N2 Ti N4 C10 -64(100) . . . . ? 
C9 Ti N4 C10 80(100) 2_755 . . . ? 
C9 Ti N4 C10 -100(100) . . . . ? 
C9 N1 C1 C3 179.84(16) . . . . ? 
Ti N1 C1 C3 -54.2(2) . . . . ? 
C9 N1 C1 C2 -57.6(2) . . . . ? 
Ti N1 C1 C2 68.4(2) . . . . ? 
C9 N2 C4 C5 126.27(19) . . . . ? 
Ti N2 C4 C5 -91.6(2) . . . . ? 
C9 N2 C4 C6 -111.2(2) . . . . ? 
Ti N2 C4 C6 30.9(2) . . . . ? 
C4 N2 C9 N1 155.02(16) . . . . ? 
Ti N2 C9 N1 -0.87(15) . . . . ? 
C4 N2 C9 N3 -24.1(3) . . . . ? 
Ti N2 C9 N3 -179.95(16) . . . . ? 
C4 N2 C9 Ti 155.89(19) . . . . ? 
C1 N1 C9 N2 142.88(17) . . . . ? 
Ti N1 C9 N2 0.87(15) . . . . ? 
C1 N1 C9 N3 -38.0(3) . . . . ? 
Ti N1 C9 N3 179.97(16) . . . . ? 
C1 N1 C9 Ti 142.00(18) . . . . ? 
C7 N3 C9 N2 150.32(19) . . . . ? 
C8 N3 C9 N2 -38.2(3) . . . . ? 
C7 N3 C9 N1 -28.7(3) . . . . ? 
C8 N3 C9 N1 142.78(19) . . . . ? 
C7 N3 C9 Ti -27(10) . . . . ? 
C8 N3 C9 Ti 145(10) . . . . ? 
N4 Ti C9 N2 110.40(10) . . . . ? 
N1 Ti C9 N2 -179.03(17) . . . . ? 
N1 Ti C9 N2 -27.11(13) 2_755 . . . ? 
N2 Ti C9 N2 -102.32(12) 2_755 . . . ? 
C9 Ti C9 N2 -69.60(10) 2_755 . . . ? 
N4 Ti C9 N1 -70.57(11) . . . . ? 
N1 Ti C9 N1 151.92(11) 2_755 . . . ? 
N2 Ti C9 N1 76.71(11) 2_755 . . . ? 
N2 Ti C9 N1 179.03(17) . . . . ? 
C9 Ti C9 N1 109.43(11) 2_755 . . . ? 
N4 Ti C9 N3 -73(10) . . . . ? 
N1 Ti C9 N3 -2(10) . . . . ? 
N1 Ti C9 N3 150(10) 2_755 . . . ? 
N2 Ti C9 N3 75(10) 2_755 . . . ? 
N2 Ti C9 N3 177(100) . . . . ? 
C9 Ti C9 N3 107(10) 2_755 . . . ? 
Ti N4 C10 C11 35(100) . . . . ? 
Ti N4 C10 C11 -145(100) . . . 2_755 ? 
N4 C10 C11 F1 1.1(2) . . . . ? 
C11 C10 C11 F1 -178.9(2) 2_755 . . . ? 
N4 C10 C11 C12 -178.85(14) . . . . ? 
C11 C10 C11 C12 1.15(14) 2_755 . . . ? 
F1 C11 C12 F2 -1.3(3) . . . . ? 
C10 C11 C12 F2 178.66(15) . . . . ? 
F1 C11 C12 C13 177.78(15) . . . . ? 
C10 C11 C12 C13 -2.3(3) . . . . ? 
F2 C12 C13 F3 0.1(2) . . . . ? 
C11 C12 C13 F3 -178.89(13) . . . . ? 
F2 C12 C13 C12 -179.9(2) . . . 2_755 ? 
C11 C12 C13 C12 1.11(13) . . . 2_755 ? 
  
_diffrn_measured_fraction_theta_max    0.900 
_diffrn_reflns_theta_full              28.86 
_diffrn_measured_fraction_theta_full   0.900 
_refine_diff_density_max    0.414 
_refine_diff_density_min   -0.343 
_refine_diff_density_rms    0.046 
